# Supplementary material for: Multicomponent asymmetric reactions mediated by proline lithium salt
Source: Royal Society of Chemistry journal article supplement (doi:10.1039/b924158b), 2010-01-01

**Supporting Information for:**

**Multicomponent Asymmetric Reactions  
Mediated by Proline-Lithium Salt.**

*Polyssena Renzi, Jacob Overgaard and Marco Bella.\**

|                                                                                                                                                                       |     |
|-----------------------------------------------------------------------------------------------------------------------------------------------------------------------|-----|
| 1. General methods                                                                                                                                                    | S2  |
| 1.1. Materials                                                                                                                                                        | S2  |
| 2. General procedure for the vinylogous aldol condensation of<br>2-cyclohexen-1-one <b>2</b> and aldehydes <b>7</b> leading to compounds <b>8</b>                     | S2  |
| 3. General procedure for the three component reaction of<br>2-cyclohexen-1-one <b>2</b> aldehydes <b>7</b> and proline <b>4</b> leading to bicyclic adducts <b>10</b> | S3  |
| 4. Copies of <sup>1</sup> H-NMR and <sup>13</sup> C-NMR spectra                                                                                                       | S4  |
| Compound <b>7a</b>                                                                                                                                                    | S4  |
| Compound <b>7b</b>                                                                                                                                                    | S5  |
| Compound <b>7c</b>                                                                                                                                                    | S6  |
| Compound <b>7d</b>                                                                                                                                                    | S7  |
| Compound <b>10a</b>                                                                                                                                                   | S8  |
| Compound <b>10b</b>                                                                                                                                                   | S9  |
| Compound <b>10c</b>                                                                                                                                                   | S10 |
| Compound <b>10d</b>                                                                                                                                                   | S11 |

## 1. General methods

$^1\text{H}$  NMR and  $^{13}\text{C}$  NMR spectra were recorded at 300 MHz and 75 MHz or at 200 MHz and 50 MHz respectively. Chemical shifts are reported in ppm relative to the resonance of  $\text{CHCl}_3$  ( $\delta = 7.26$ ) for  $^1\text{H}$  NMR and to the central peak of  $\text{CDCl}_3$  ( $\delta = 77.5$ ) for  $^{13}\text{C}$  NMR. Flash chromatography (FC) was carried out using Merck silica gel 60 (230-400 mesh) using mixtures of petroleum ether 30-50° C (PE) and diethyl ether for compounds **7** or a mixture of ethyl acetate/methanol for compounds **10**.

### 1.1 Materials

Analytical grade solvents were used as received. All commercially available reagents were employed as received including aldehydes **7**, proline **4**, 2-cyclohexen-1-one **2**. Proline-**4** lithium salt has been prepared accordingly to standard literature procedures.

## 2. General procedure for the vinylogous aldol condensation of 2-cyclohexen-1-one and aldehydes **7** leading to compounds **8**.

2-Cyclohexen-1-one **2** (1 g, 10.4 mmol, 1 eq) and aldehydes **7a-d** (20.8 mmols, 2 eq) were added to a stirred suspension of proline **4**-lithium salt (1.26 g, 1 eq) in toluene (20 mL). After 24 h water (40 mL) was added and the mixture extracted twice with ethyl acetate (100 mL). The combined organic layers were dried over anhydrous  $\text{Na}_2\text{SO}_4$  and the solvent removed *in vacuo*. The crude material was purified by FC (eluant: PE:diethyl ether from the ratio 10:1 to 1:3) to afford compounds **8a-d** in yield % accordingly to scheme 2.

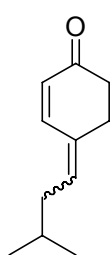

**8a**

Mixture of *E-Z* isomers in the ratio 3:1

$^1\text{H-NMR}$  (200 MHz);  $\delta$  ( $\text{CDCl}_3$ ): 7.43 (d, 1H,  $J = 10$  Hz *Z*-isomer), 7.01 (d, 1H,  $J = 10.2$  Hz *E*-isomer), 5.86 (m, 2H), 2.73 (m, 2H), 2.52 (m, 2H), 1.70 (m, 1H), 0.92 (d, 6H).

$^{13}\text{C-NMR}$  (50 MHz);  $\delta$  ( $\text{CDCl}_3$ ): 207.29, 199.64, 149.78, 142.11, 137.41, 134.18, 133.60, 132.00, 127.1, 125.52, 68.55, 63.45, 37.84, 36.70, 28.76, 26.70, 24.58, 23.48, 22.43, 21.86, 21.04, 20.06.

**HRMS** calc. ( $\text{C}_{11}\text{H}_{16}\text{NaO}^+$ ): 187.1099; found: 187.1089

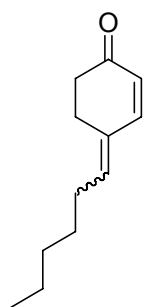

Mixture of *E-Z* isomers in the ratio 4:1

$^1\text{H-NMR}$  (300 MHz);  $\delta$  ( $\text{CDCl}_3$ ): 7.43 (d, 1H,  $J = 10$  Hz *Z*-isomer), 7.41 (d, 1H,  $J = 10.2$  Hz, *E*-isomer), 5.87 (m, 2H), 2.70 (m, 2H), 2.50 (m, 2H), 2.18 (m, 2H), 1.2 (m, 6H), 0.88 (m, 3H).

$^{13}\text{C-NMR}$  (75 MHz);  $\delta$  ( $\text{CDCl}_3$ ): 200.1, 200.0, 150.3, 142.5, 139.1, 135.9, 133.3, 131.2, 127.5, 125.9, 38.4, 35.5, 37.1, 32.0, 31.9, 31.5, 29.7, 29.3, 29.1, 28.4, 24.0, 22.9, 14.5, 14.4.

**HRMS** calc. ( $\text{C}_{12}\text{H}_{18}\text{NaO}^+$ ): 201.1255; found: 201.1270

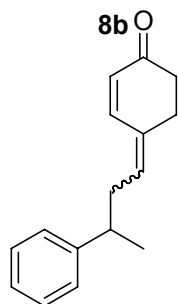

**rac-8c**

Mixture of *E-Z* isomers in the ratio 5:1

$^1\text{H-NMR}$  (200 MHz);  $\delta$  ( $\text{CDCl}_3$ ): 7.27 (m, 6H), 6.9 (d, 1H), 5.9 (m, 1H), 2.8 (m, 2H), 2.4 (m, 5H), 1.3 (d, 3H).

$^{13}\text{C-NMR}$  (50 MHz);  $\delta$  ( $\text{CDCl}_3$ ): 199.9, 199.4, 149.4, 146.2, 141.7, 136.1, 135.9, 134.0, 133.0, 132.4, 130.9, 128.5, 127.3, 127.1, 126.4, 126.2, 125.7, 40.2, 39.9, 39.7, 37.9, 37.5, 36.7, 36.6, 31.2, 29.8, 23.7, 21.7.

**HRMS** calc. ( $\text{C}_{16}\text{H}_{18}\text{NaO}^+$ ): 249.1255; found: 249.1258

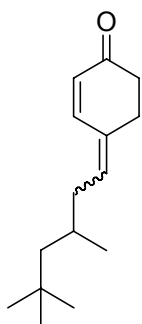

rac-8d

Mixture of *E-Z* isomers in the ratio 5:1

**<sup>1</sup>H-NMR** (200 MHz);  $\delta$  (CDCl<sub>3</sub>): 7.40(d, 1H, *J*= 10 Hz *Z*-isomer ), 7 (d, 1H, *J*= 10 Hz *E*-isomer), 5.85 (m, 2H), 2.7 (m, 2H), 2.5(m, 2H), 2.1(m, 3H), 0.98 (d, 3H), 0.90 (s, 9H).

**<sup>13</sup>C-NMR** (50 MHz);  $\delta$  (CDCl<sub>3</sub>): 200.0, 199.6, 149.8, 142.2, 137.6, 134.4, 133.7, 132.0, 127.2, 125.5, 65.9, 50.9, 50.7, 38.3, 38.0, 37.5, 36.7, 31.2, 31.2, 30.4, 30.4, 30.33, 30.09, 29.97, 29.79, 29.74, 23.86, 22.71, 22.65, 15.34.

**HRMS** calc. (C<sub>15</sub>H<sub>24</sub>NaO<sup>+</sup>): 243.1725; found: 243.1701.

### 3. General procedure for the three component reaction of 2-cyclohexen-1-one, 2 aldehydes 7, and proline 4 leading to bicyclic adducts 10.

2-Cyclohexen-1-one **2** (1gr, 10.4 mmol, 1 eq) and aldehydes **7a-b** and **7e-g** (20.8 mmols, 2 eq) were added to a suspension of proline **4**-lithium salt (1.26 gr, 1eq) in toluene (20 mL). The reaction was stirred at rt up to 5 days (scheme 2). Without performing any aqueous workup DCM was added to the crude reaction mixture. After the time indicated in table 1, the suspension was filtered over a pad of celite in order to remove any unreacted salt of proline. The solvent was then removed *in vacuo* and the products were purified by FC (eluant: diethyl ether first, then ethyl acetate and last ethyl acetate: methanol from the ratio 100:1 to 4:1), to afford compounds **10** as described in table 1. Compounds **10** were further purified by crystallization.

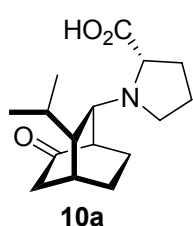

10a

**<sup>1</sup>H-NMR** (200 MHz);  $\delta$  (D<sub>2</sub>O): 3.76 (m, 1H), 3.38 (m, 1H), 3.29 (m, 1H), 2.57 (m, 1H), 2.38 (m, 1H), 1.97 (m, 4H), 1.69 (m, 2H), 1.43 (m, 6H), 0.99 (m, 2H), 0.72 (d, 3H *J*=6.0 Hz), 0.59 (d, 3H, *J*=6.0 Hz).

**<sup>13</sup>C-NMR** (50 MHz);  $\delta$  (D<sub>2</sub>O): 219.8, 173.2, 67.9, 66.6, 65.2, 52.2, 51.9, 45.9, 45.1, 45.0, 30.0, 29.2, 23.2, 22.3, 20.4, 19.2, 18.3.

$[\alpha]_D^{25} = -14.2$  (c= 9 mg / mL. CH<sub>2</sub>Cl<sub>2</sub>)

**HRMS** calc. (C<sub>16</sub>H<sub>25</sub>NNaO<sub>3</sub><sup>+</sup>): 302.1732; found: 302.1720.

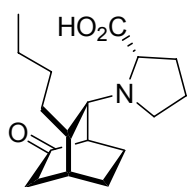

10b

**<sup>1</sup>H-NMR** (300 MHz);  $\delta$  (CDCl<sub>3</sub>): 6.7 (bs, 1H), 3.9-3.7 (m, 2H), 3.0-2.8 (m, 1H), 2.8 (m, 1H), 2.5-2.6 (m, 1H), 2.4-1.3 (m, 16 H), 0.9 (t, 3H, *J*=6.6).

**<sup>13</sup>C-NMR** (75 MHz);  $\delta$  (CDCl<sub>3</sub>): 213.4, 173.6, 67.6, 66.8, 54.0, 47.5, 42.0, 39.0, 34.8, 30.8, 30.1, 30.0, 25.6, 24.6, 23.1, 17.6, 14.7.

$[\alpha]_D^{25} = -163.2$  (c= 5 mg / mL. CH<sub>2</sub>Cl<sub>2</sub>)

**HRMS** calc. (C<sub>17</sub>H<sub>27</sub>NNaO<sub>3</sub><sup>+</sup>): 316.1889; found: 316.1892.

Melting point: 97.2-98.5

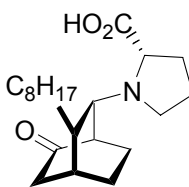

10c

**<sup>1</sup>H-NMR** (300 MHz);  $\delta$  (CDCl<sub>3</sub>): 3.8-3.6 (m, 2H), 3.0-2.8 (m, 1H), 2.7 (m, 1H), 2.5 (m, 1H), 2.4-1.2 (m, 24H), 0.88 (t, *J*= 6Hz),

**<sup>13</sup>C-NMR** (75 MHz);  $\delta$  (CDCl<sub>3</sub>): 213.2, 173.6, 67.5, 66.6, 53.9, 51.3, 42.4, 39.0, 35.2, 32.3, 30.8, 30.1, 30.0, 29.9, 29.7, 28.0, 25.7, 24.8, 23.1, 17.5, 14.5.

$[\alpha]_D^{25} = -2.6$  (c= 35mg / mL. CH<sub>2</sub>Cl<sub>2</sub>)

**HRMS** calc. (C<sub>21</sub>H<sub>35</sub>NNaO<sub>3</sub><sup>+</sup>): 372.2515; found: 372.2518.

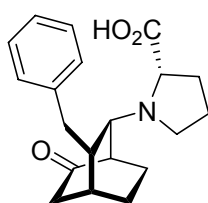

10d

**<sup>1</sup>H-NMR** (300 MHz);  $\delta$  (DMSO-*d*<sub>6</sub>): 7.2 (m, 5H). 3.5 (m, 1H), 3.3 (m, 1H), -2.8-1.2 (m, 17H)

**<sup>13</sup>C-NMR** (75 MHz);  $\delta$  (DMSO-*d*<sub>6</sub>): 215.1, 176.1, 140.8.2, 129.4, 129.0, 126.7, 64.3, 64.2, 51.9, 48.5, 44.0, 40.8, 39.3, 30.5, 29.5, 25.6, 23.9, 16.8.

$[\alpha]_D^{25} = -18.4$  (c= 29 mg / mL. CH<sub>2</sub>Cl<sub>2</sub>)

**HRMS** calc. (C<sub>20</sub>H<sub>25</sub>NNaO<sub>3</sub><sup>+</sup>): 350.1732; found: 350.1711.

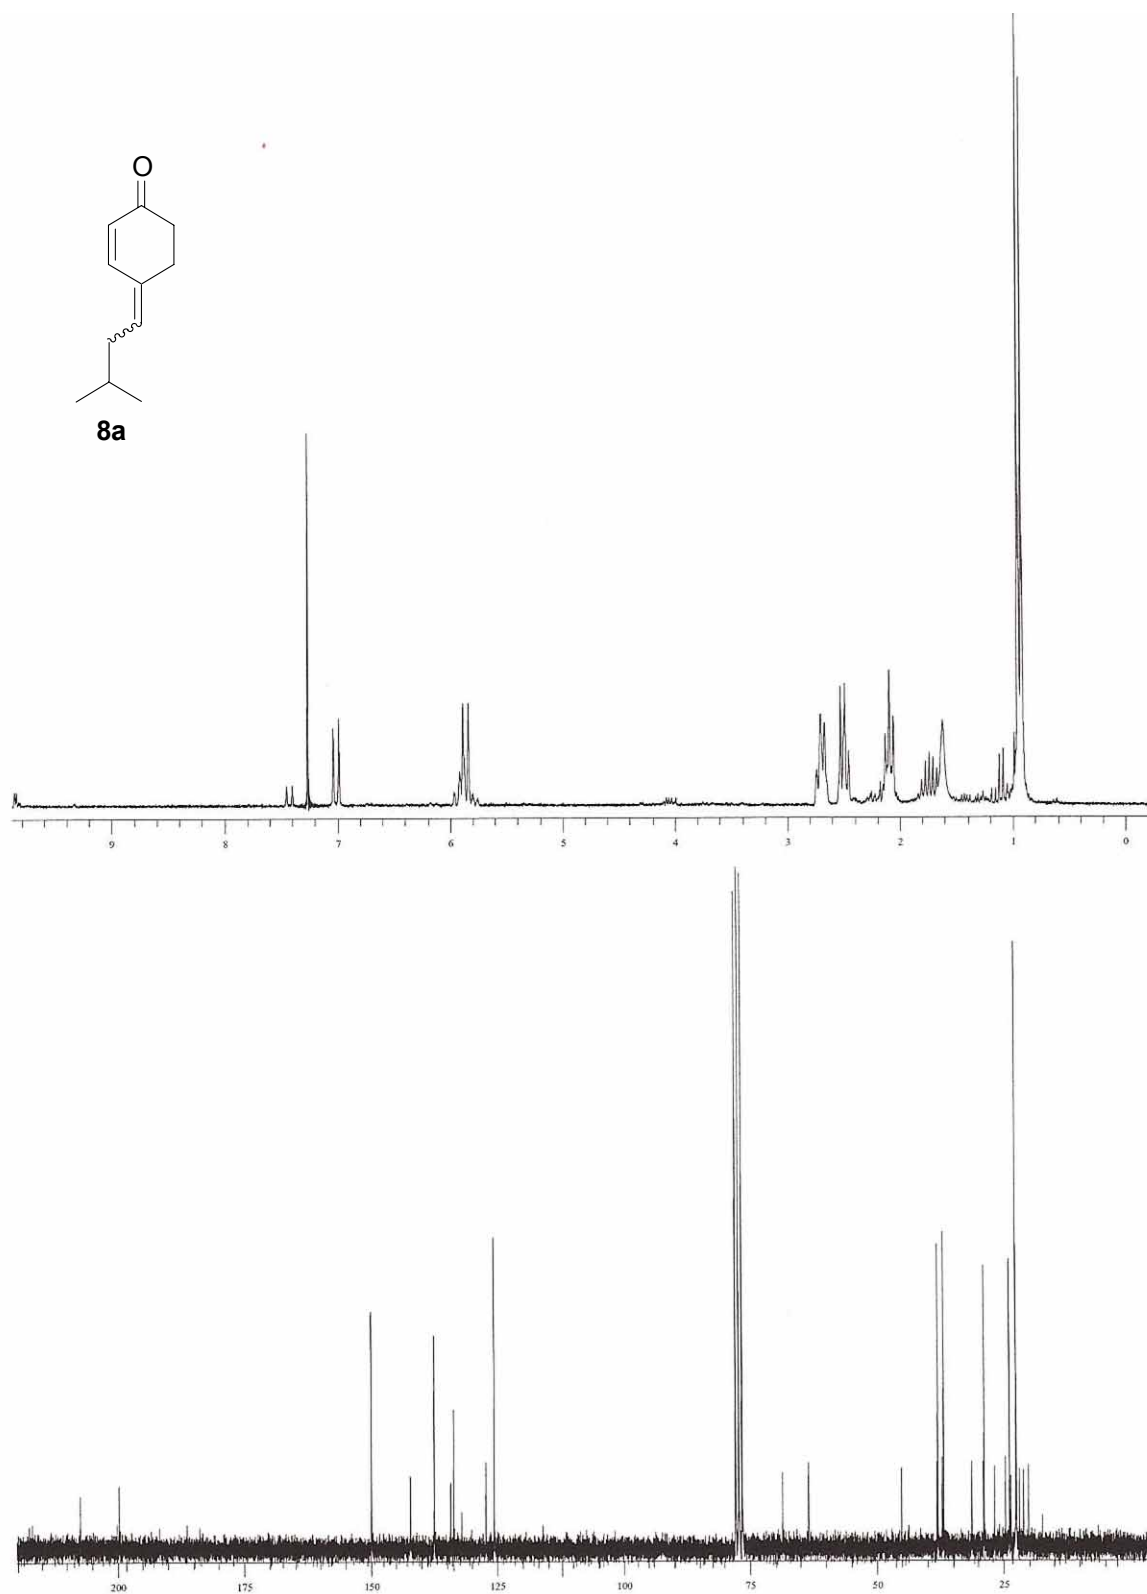

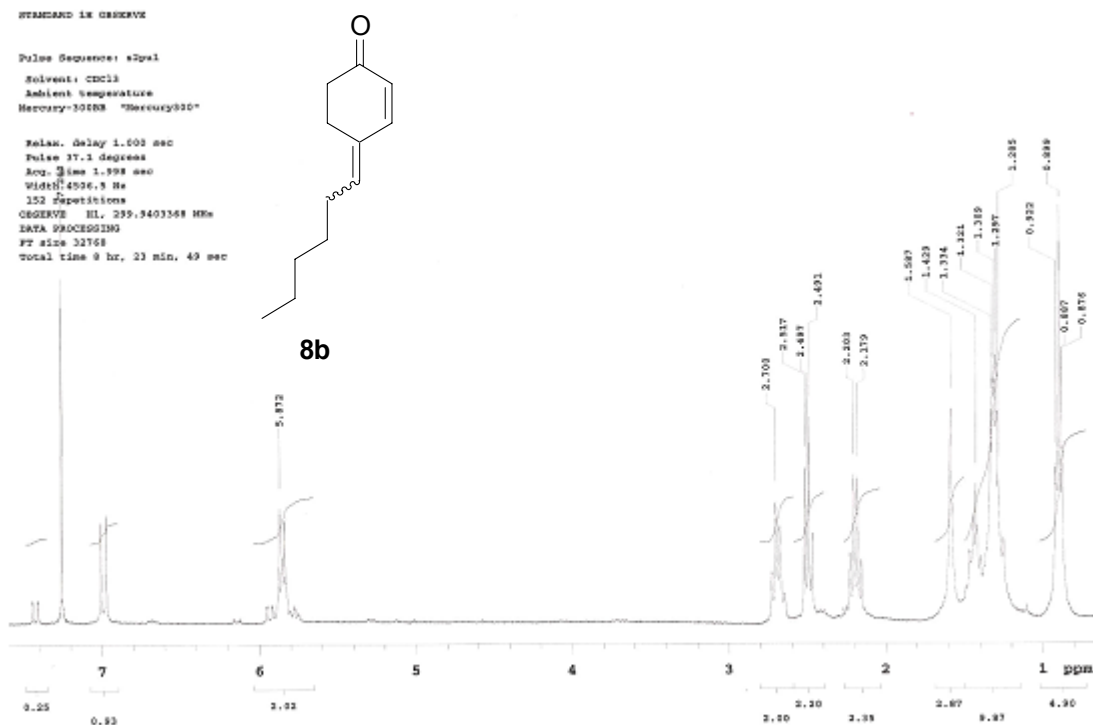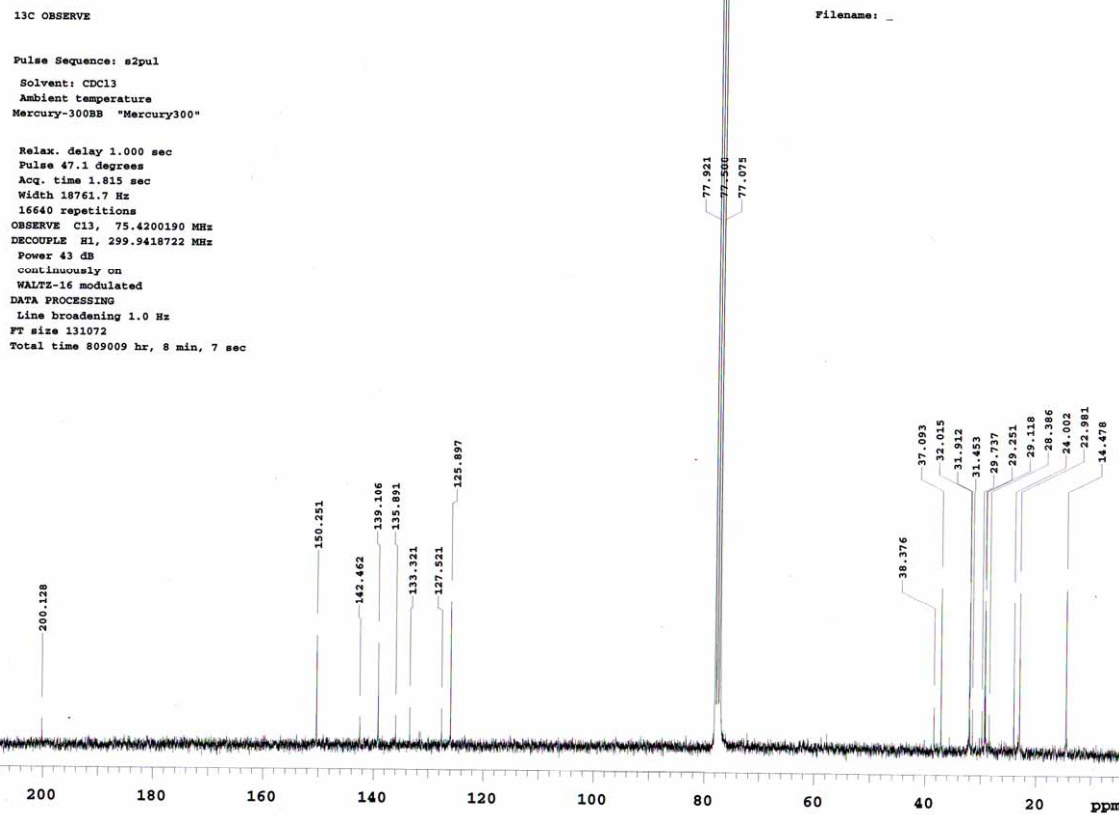

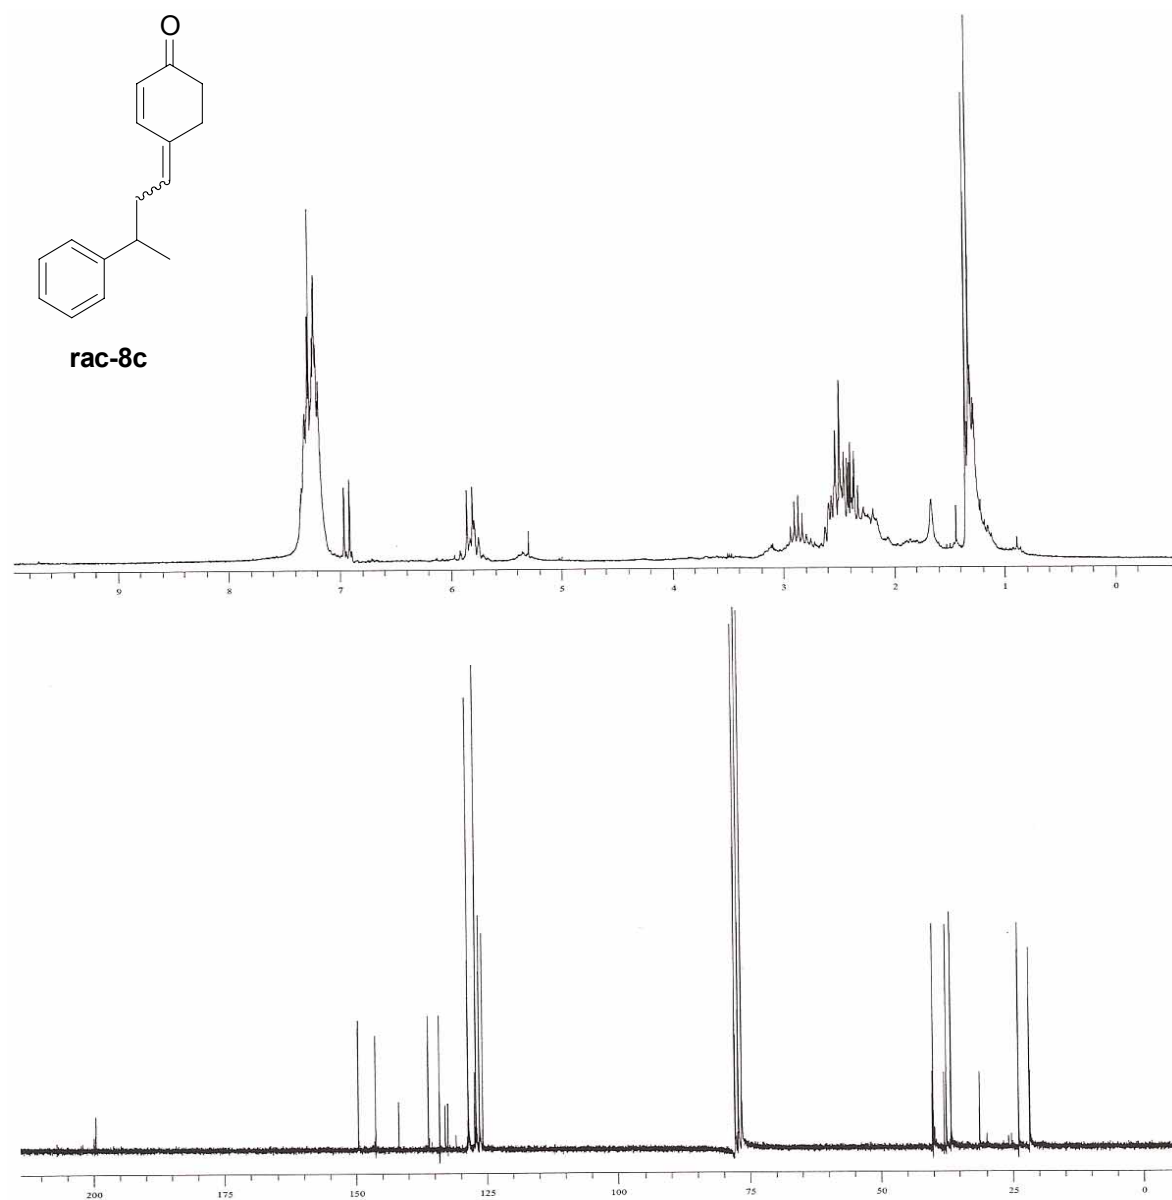

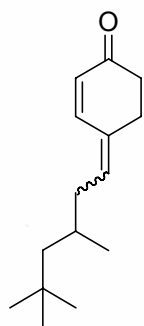

**rac-8d**

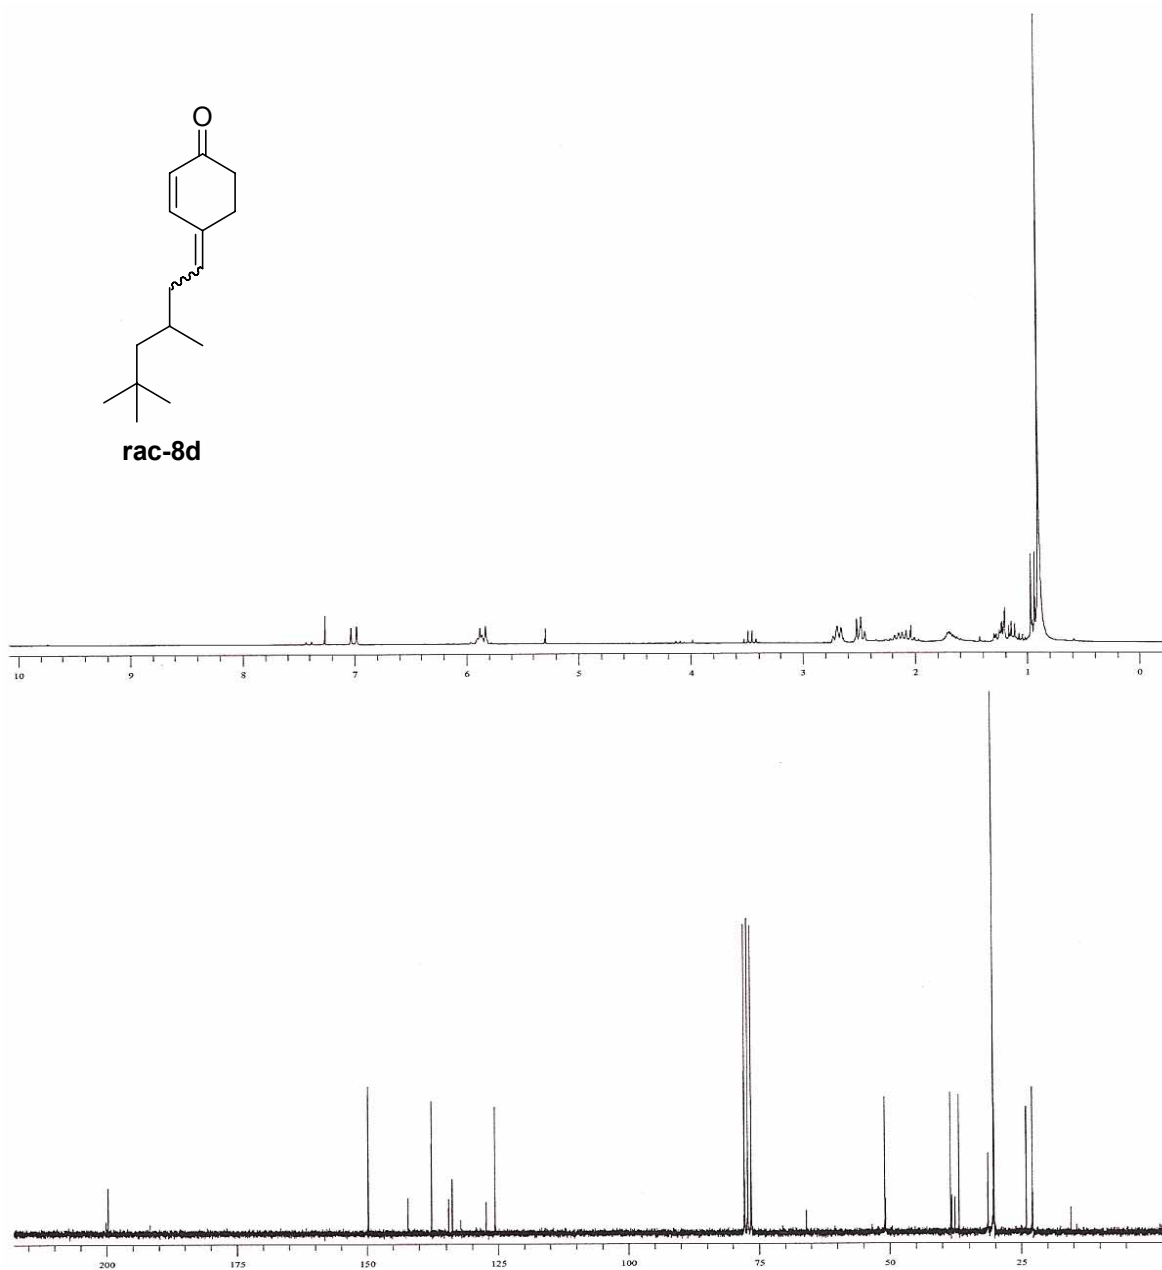

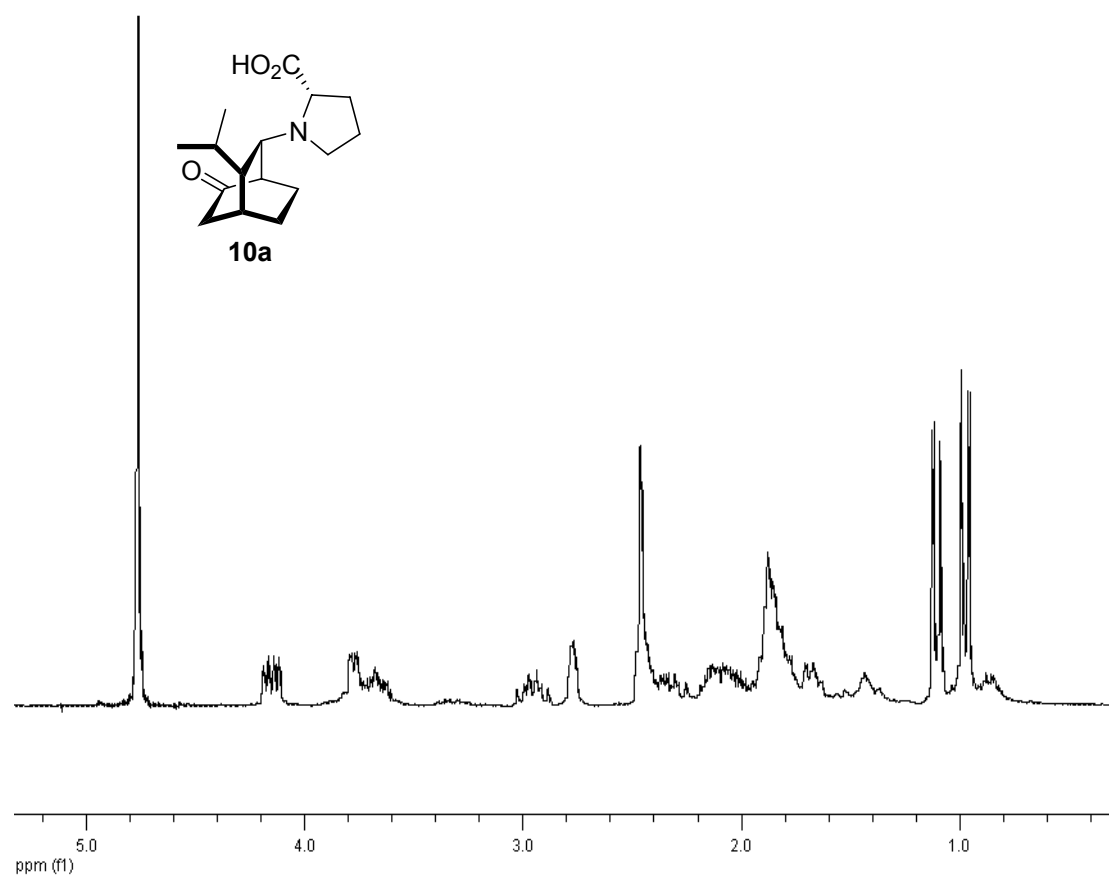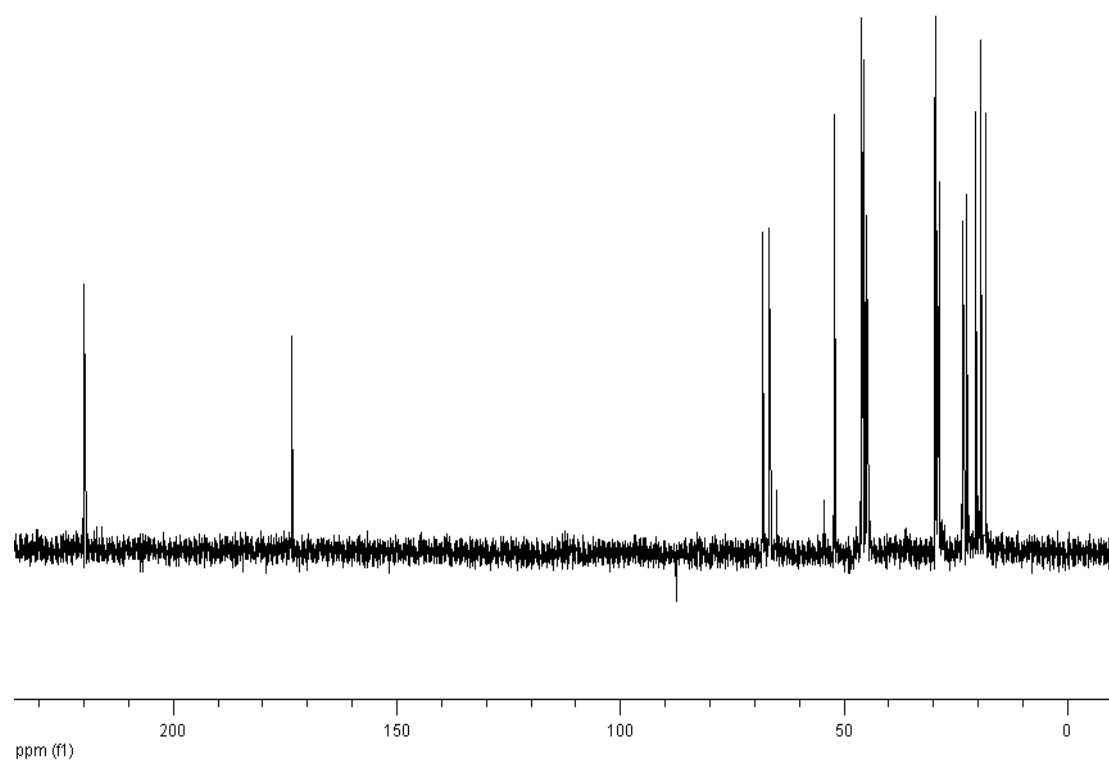



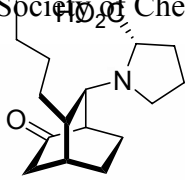

STANDARD 1H OBSERVE  
 Pulse Sequence: s2pul  
 Solvent: CDCl3  
 Ambient temperature  
 Mercury-300BB "Mercury300"  
 Relax. delay 1.000 sec  
 Pulse 37.1 degrees  
 Acq. time 1.998 sec  
 Width 4506.5 Hz  
 12 repetitions  
 OBSERVE H1, 299.9403373 MHz  
 DATA PROCESSING  
 FT size 32768  
 Total time 5 min, 35 sec

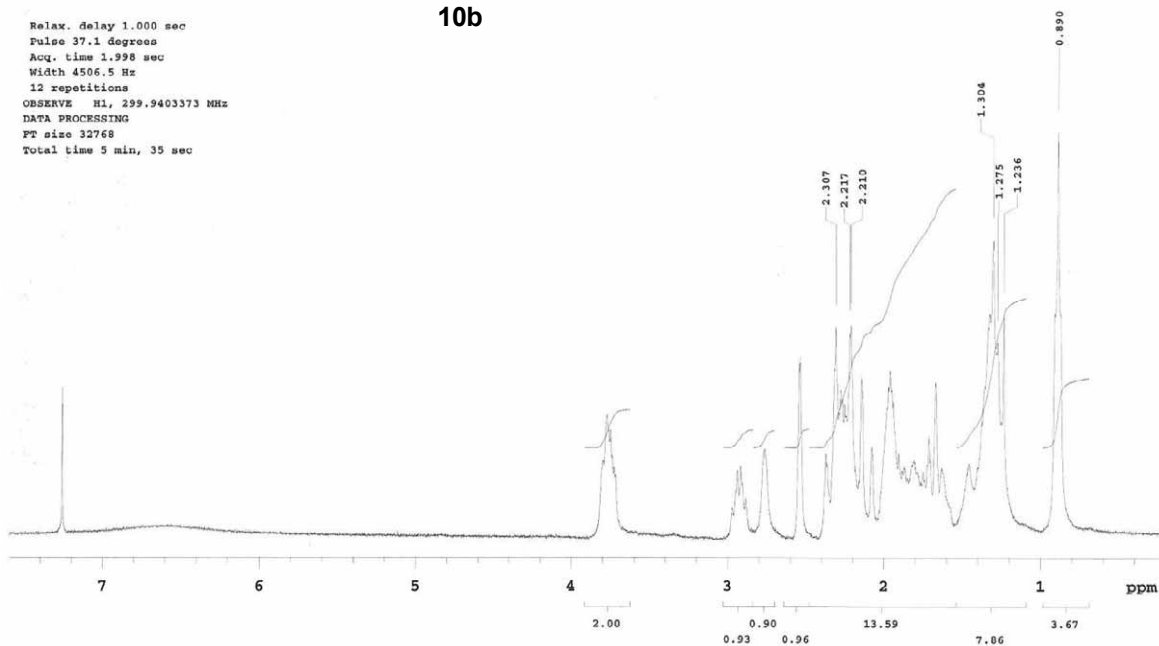

13C OBSERVE  
 Pulse Sequence: s2pul  
 Solvent: CDCl3  
 Ambient temperature  
 Mercury-300BB "Mercury300"  
 Relax. delay 1.000 sec  
 Pulse 47.1 degrees  
 Acq. time 1.815 sec  
 Width 18761.7 Hz  
 400 repetitions  
 OBSERVE C13, 75.4200199 MHz  
 DECOUPLE H1, 299.9418722 MHz  
 Power 43 dB  
 Continuously on  
 WALTZ-16 modulated  
 DATA PROCESSING  
 Line broadening 1.0 Hz  
 FT size 131072  
 Total time 14 hr, 24 min, 28 sec

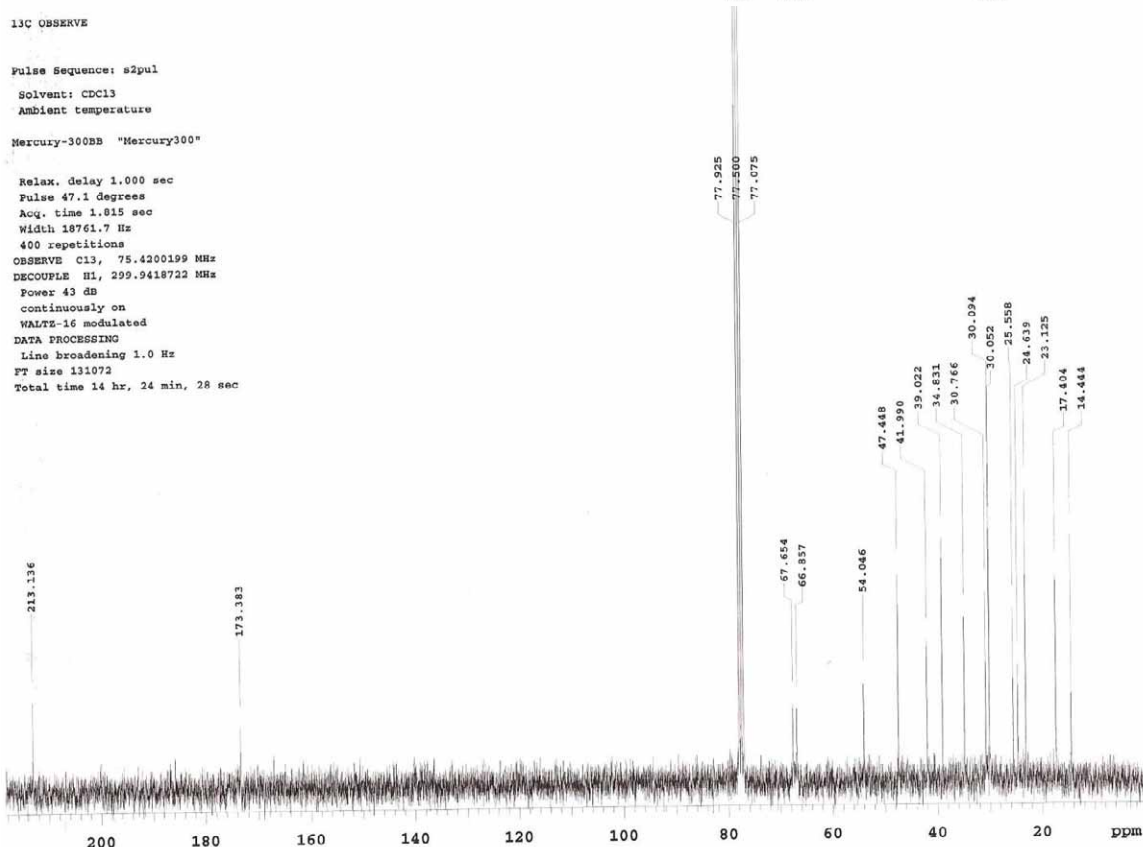

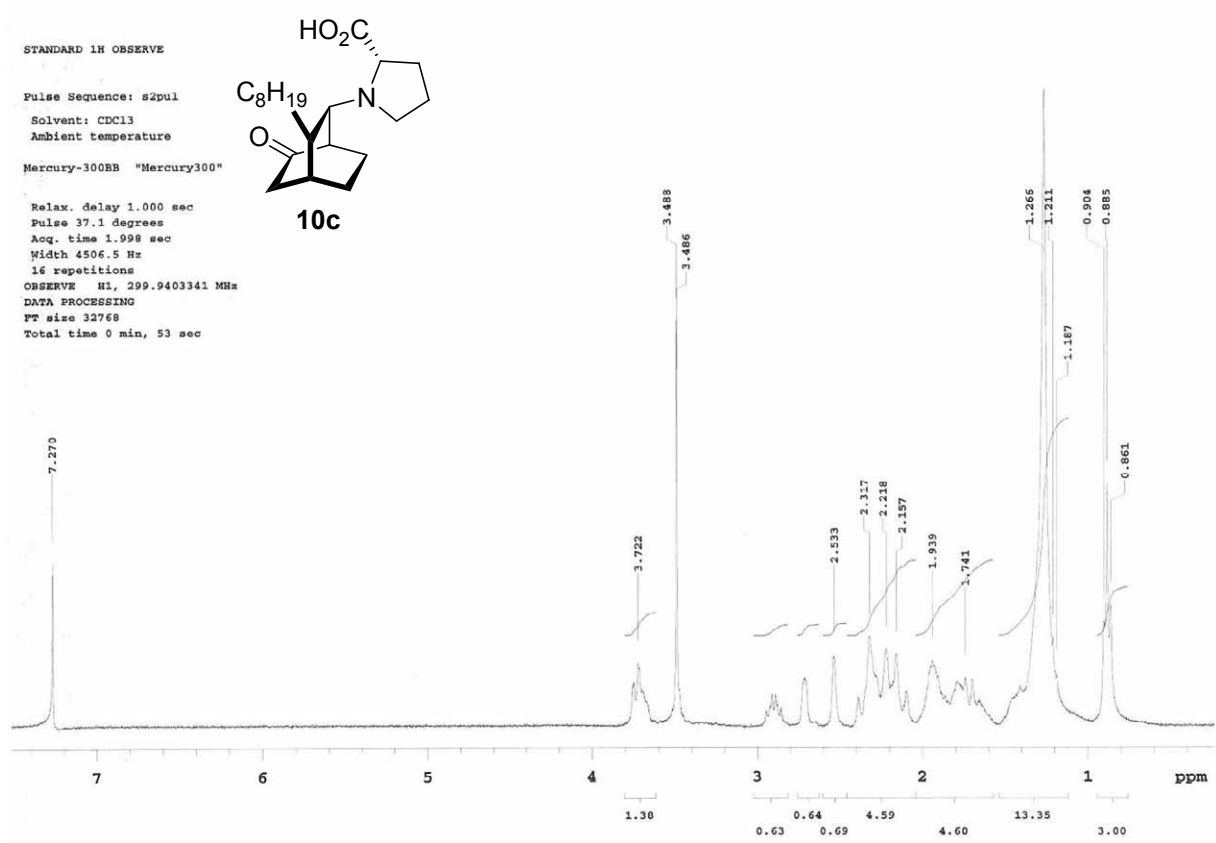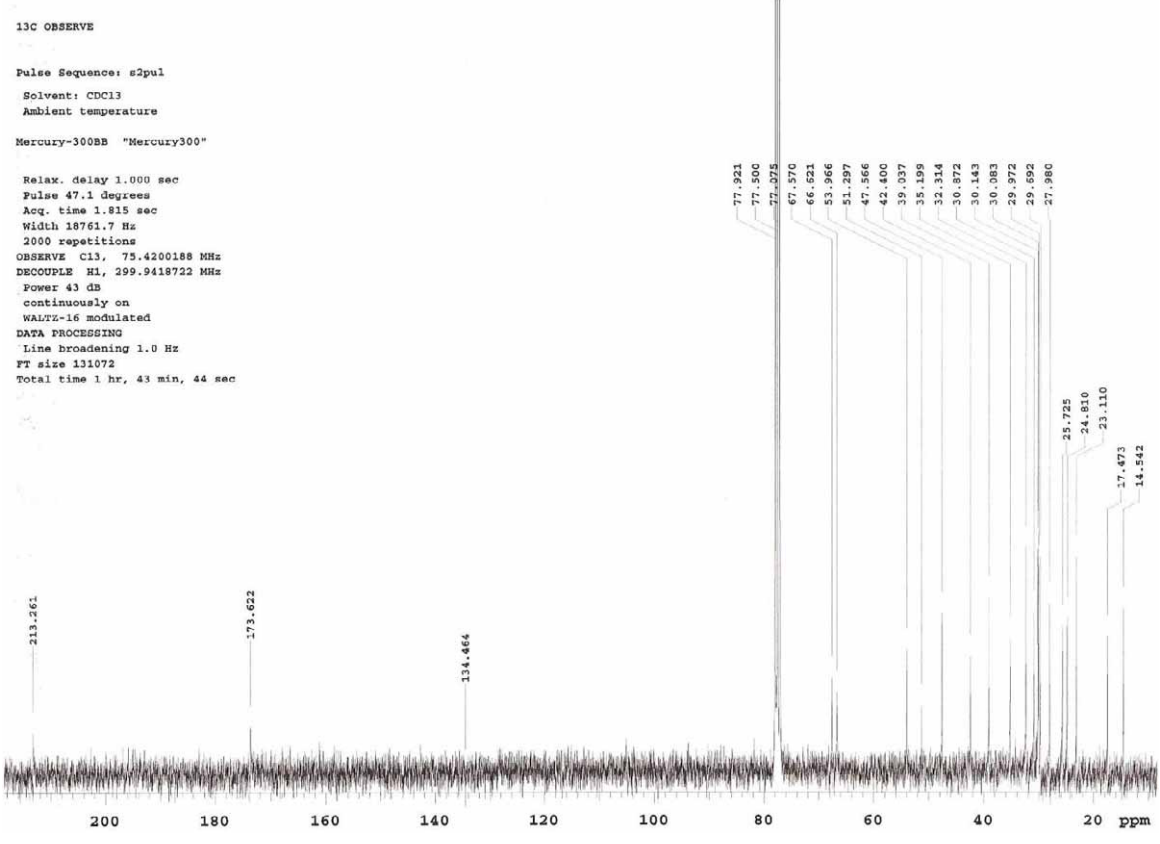

STANDARD 1H OBSERVE  
Pulse Sequence: s2pul  
Solvent: DMSO  
Ambient temperature  
Mercury-300DB "Mercury300"  
Relax. delay 1.000 sec  
Pulse 37.1 degrees  
Acq. time 1.998 sec  
Width 4506.5 Hz  
12 repetitions  
OBSERVE H1, 299.9417621 MHz  
DATA PROCESSING  
FT size 32768  
Total time 0 min, 53 sec

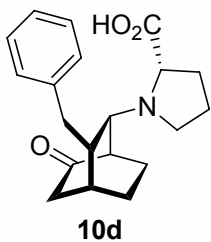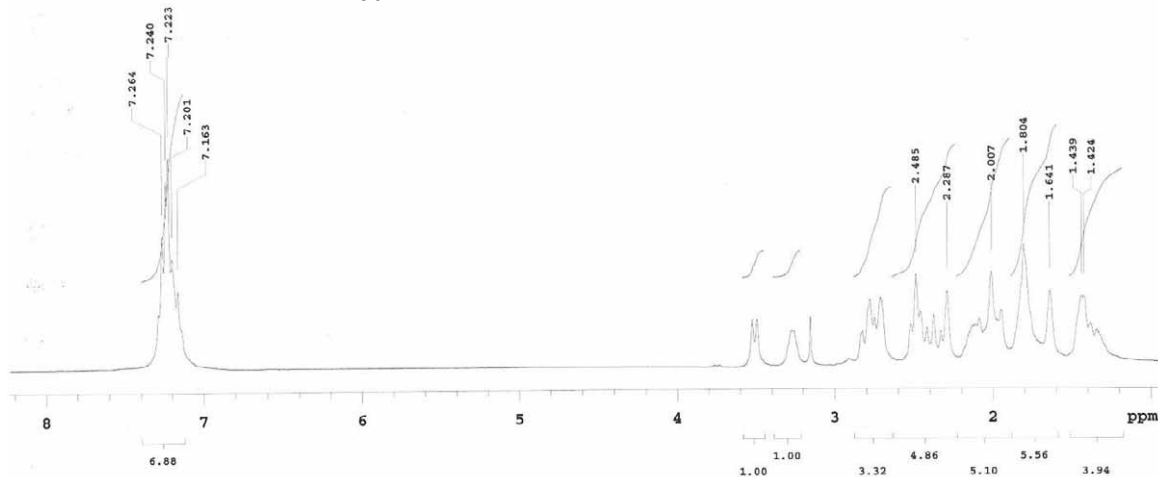

13C OBSERVE  
Pulse Sequence: s2pul  
Solvent: DMSO  
Ambient temperature  
Mercury-300DB "Mercury300"  
Relax. delay 1.000 sec  
Pulse 47.1 degrees  
Acq. time 1.815 sec  
Width 18761.7 Hz  
240 repetitions  
OBSERVE C13, 75.4203981 MHz  
DECOUPLE H1, 299.9432969 MHz  
Power 43 dB  
continuously on  
WALTZ-16 modulated  
DATA PROCESSING  
Line broadening 1.0 Hz  
FT size 131072  
Total time 518 hr, 41 min, 12 sec

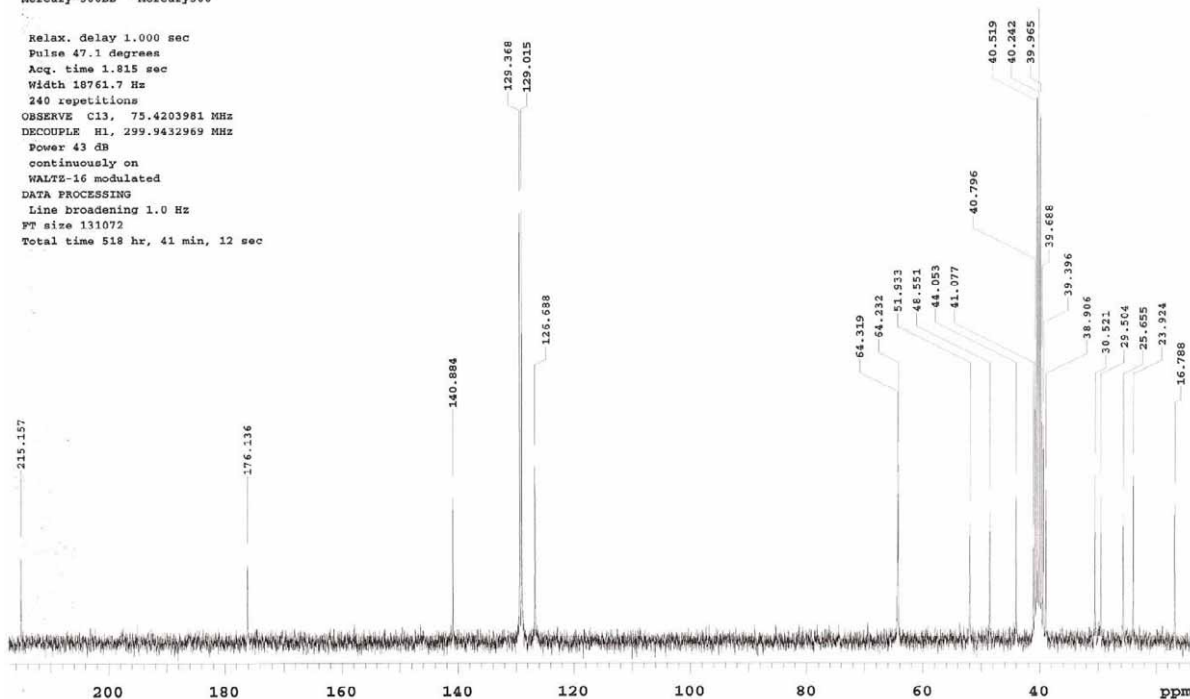

Supplement: b924158b.pdf [file b924158b.pdf]
